# Supplementary material for: Development of the Equine Hindgut Microbiome in Semi-feral and Domestic Conventionally-Managed Foals
Source: Research Square preprint supplement (doi:10.21203/rs.3.rs-53473/v2), 2020-10-27
Supplement: Supplementary file 1 [file 2526439b8f9d9dd602c93eff.docx]

*Tables*

**Table 1.** Guaranteed analysis of DCM dam’s feed (Winbak Original 14 Custom Cube, McCauley Bros., Versailles, KY), which the foal had access to throughout the study period.

| Crude Protein, min | 14.0% |
| --- | --- |
| Crude Fat, min | 3.5% |
| Crude Fiber, max | 12.0% |
| Calcium, min | 1.0% |
| Calcium, max | 1.5% |
| Phosphorus, min | 0.75% |
| Copper, min | 30 ppm |
| Selenium, min | 0.4 ppm |
| Zinc, min | 100 ppm |
| Vitamin A, min | 4000 IU/lb |
| Vitamin D, min | 800 IU/lb |
| Vitamin E, min | 100 IU/lb |

**Table 2.** Highly significantly different groups at the family level between SFM and DCM foals (Kruskal-Wallis, p<0.01). Taxa are shown in the group in which they were enriched.

**Table 3.** Significantly enriched taxa at the family, genus and species level found in SFM foals from ages 1 to 6 weeks (p<0.05, Kruskal-Wallis, LDA score>2.0) compared with all other weeks.

**Table 4.** Significantly enriched taxa at the family, genus and species level found in DCM foals from ages 1 to 6 weeks (p<0.05, Kruskal-Wallis, LDA score>2.0) compared with all other weeks.
